# Supplementary material for: Anti-LDLR modified TPZ@Ce6-PEG complexes for tumor hypoxia-targeting chemo-/radio-/photodynamic/photothermal therapy
Source: Royal Society of Chemistry journal article supplement (doi:10.1039/c9tb02248a), 2019-12-18
Supplement: c9tb02248a1.pdf [file c9tb02248a1.pdf]

## Anti-LDLR Modified TPZ@Ce6-PEG Complexes for Tumor Hypoxia-Targeting Chemo-/Radio-/Photodynamic/Photothermal Therapy

Chuanhui Song<sup>a,c,‡</sup>, Wenguang Xu<sup>a,c,‡</sup>, Zheng Wei<sup>c,e</sup>, Changjin Ou<sup>b</sup>, Jinhui Wu<sup>d</sup>, Jinlong Tong<sup>f</sup>, Yu Cai<sup>a\*</sup>, Xiaochen Dong<sup>b\*</sup>, Wei Han<sup>c\*</sup>

<sup>a</sup>Central Laboratory of Stomatology, Nanjing Stomatological Hospital, Medical School of Nanjing University, No 30 Zhongyang Road, Nanjing, 210008, China.

*E-mail: iamycail@163.com*

<sup>b</sup>School of Chemistry and Materials Science, Nanjing University of Information Science & Technology, Nanjing 210044, China.

*E-mail: iamxcdong@njtech.edu.cn*

<sup>c</sup>Department of Oral and Maxillofacial Surgery & Pediatric Dentistry, Nanjing Stomatological Hospital, Medical School of Nanjing University, No 30 Zhongyang Road, Nanjing, 210008, China.

*E-mail: doctorhanwei@hotmail.com*

<sup>d</sup>State Key Laboratory of Pharmaceutical Biotechnology, Medical School of Nanjing University and School of Life Sciences, Nanjing University, Nanjing, 210093, China

<sup>e</sup>Pediatric Dentistry, Nanjing Stomatological Hospital, Medical School of Nanjing University, No 30 Zhongyang Road, Nanjing, 210008, China.

<sup>f</sup>Department of Radiotherapy, the Second Hospital of Nanjing, Nanjing University of Chinese Medicine, No 1 Zhongfu Road, Nanjing, 210003, China.

<sup>‡</sup>These authors contributed equally to this work.

## **Experimental data**

### **Materials**

1-ethyl-3-(3-(dimethylamino) propyl) carbodimide (EDC), Dimethyl sulfoxide (DMSO), sulfo-NHS (N-hydroxysulfosuccinimide) and Chlorine e6 (Ce6) were obtained from Adamas-beta. NH<sub>2</sub>-mPEG-NH<sub>2</sub>(2k) was obtained from ToYong Bio Co., Ltd. (Shanghai, China). Cell counting kit (CCK-8), Trypsin-EDTA (0.25%) and DMEM culture medium were from KeyGEN BioTECH (Jiangsu, China). Deionized water was used in all experiments and was prepared using a Millipore ultrapure water system (Billerica, MA).

### **Antibodies**

The monoclonal rabbit anti-LDLR (ab51037), monoclonal mouse anti-HIF-1 $\alpha$  (ab113642) and monoclonal rabbit anti-gamma H2A.X (ab81299) were obtained from Abcam. The polyclonal rabbit anti-LDLR antibody (10785-1-AP) was obtained from Proteintech. The monoclonal mouse anti human LDLR antibody (IgG<sub>1</sub> Clone # 472413) was obtained from R&D Systems.

### **Clinical samples**

Tumor samples and adjacent normal samples of HNSCC patients were obtained from the Biobank of Nanjing Stomatological Hospital approved by the Ethics Committee of Nanjing Stomatological Hospital. Written informed consent was obtained from all patients for research use. Formalin-fixed, paraffin-embedded (FFPE) HNSCC samples were also obtained from the Biobank of Nanjing Stomatological Hospital. All slides were reviewed by a board-certified pathologist for the identification of lymph node metastasis status of HNSCC patients.

### **Quantitative real-time PCR of HIF-1 signaling pathway genes**

Total RNA was extracted from frozen specimens of HNSCC patients using TRIZOL Reagent (Invitrogen, Cat.No.15596-026) following their RNA isolation protocol. RNA was reverse transcribed into cDNA using a PrimeScript RT Master Mix kit (Takara, Code No. RR036A). Quantitative real-time PCR was performed on an ABI7500 PCR system (Applied Biosystems, Warrington, UK) using 1  $\mu$ l of cDNA for each sample. SYBR green (Applied Biosystems) was used to detect the products, and 20 pmol of primer was used for the reaction. All reactions were carried out with 20  $\mu$ l of reaction mix and conducted in triplicate. The expression of a total of 88 genes from HIF-1 signaling pathway was detected. The basic

information and primers of these genes could be seen in Supplementary Table 1. The following conditions were employed for PCR: 50 °C for 2 min, then 95 °C for 15 min, followed by 40 cycles at 95 °C for 1 min each. All reactions were analyzed using the ABI7500 Applied Biosystems PCR software (v.2.0.5). The cycle threshold values of the target genes were initially normalized to the cycle threshold values of ACTB, and melt curves were examined to detect the specificity of the reactions. The comparative Ct method was used to calculate the relative changes in gene expression on the 7500 Fast Real Time PCR System.

### **Immunohistochemistry (IHC)**

Immunohistochemical analysis for LDLR proteins expression was performed in 75 HNSCC samples tissue. Four- $\mu$ m-thick tissue sections were cut, deparaffinised, and subjected to antigen recovery treatment with 100 mM citrate buffer target retrieval solution, pH 6.0 at 95 °C, in a water bath for 20 minutes. Endogenous peroxidase activity was blocked by incubating with phosphate-buffered saline (PBS) and 3% hydrogen peroxidase for 30 minutes. After washing with PBS, the sections were incubated with monoclonal rabbit anti-LDLR (1:400, ab51037, Abcam) and overnight, followed by the Envision Dual Link System HRP method (Dako, K4061) for LDLR antibodies. Immunostaining evaluation was performed by two independent pathologists blinded to clinical data. The percentage of positive tumor cells was evaluated and graded as negative (0–10%), weakly positive (10–50%) and strongly positive (> 50%), irrespective of cell type<sup>26,42</sup>. A third pathologist would intervene if agreements could not be reached between the two pathologists.

### **Western blot**

Cells cultured under hypoxic or normoxic conditions were harvested and lysed for 20 min using modified RIPA buffer supplemented with a protease inhibitor cocktail (Sigma-Aldrich). Protein extracts were loaded onto a 6% sodium dodecyl sulfate–polyacrylamide gel, electrophoresed, and transferred to a polyvinylidene difluoride membrane. Protein bands were probed with Mouse anti-HIF-1 $\alpha$  monoclonal antibody (1:100, Abcam) and other experimental primary antibodies at 4 °C overnight after blocking with 5% separated milk, followed by alkaline phosphatase-linked secondary antibody (Cell Signaling Technology, USA) incubation for 1 h at 37 °C. Beta-tubulin was used as a loading control.

### **Immunofluorescence**

Xenografts tumor: 90 min before sacrificed, mice bearing HSC3 tumors (~100 mm<sup>3</sup>) were i.v. injected with pimonidazole hydrochloride (0.6 mg per 10g body weight). After sacrificed, tumors were embedded in optimal cutting temperature (OCT) compound and then cut into 10 μm sections. Sections were incubated with antipimonidazole antibody (dilution 1:100, Hypoxyprobe Inc.) and then followed with Dylight 488-goat anti-rabbit IgG secondary antibody (dilution 1:100, Earthox). To detected LDLR, LDLR rabbit polyclonal antibody (dilution 1:100, Proteintech) and Dylight 594-goat anti-rabbit IgG secondary antibody (dilution 1:100, Earthox) were used. After stained with DAPI (KeyGEN), slices were captured and analyzed by CLSM.

Tumors derived from HNSCC patients were embedded in optimal cutting temperature (OCT) compound and then cut into 10 μm sections. LDLR rabbit polyclonal antibody (dilution 1:100, Proteintech) and Dylight 488-goat anti-rabbit IgG secondary antibody (dilution 1:100, Earthox) were used to detected LDLR. Mouse anti-HIF-1α monoclonal antibody (dilution 1:100, Abcam) and Dylight 594-donkey anti-mouse IgG (dilution 1:100, Earthox) were used to detected HIF-1α. After stained with DAPI (KeyGEN), slices were captured and analyzed by CLSM.

### **Gene set enrichment analysis (GSEA)**

Microarray dataset of HNSCC was downloaded from Gene Expression Omnibus (GEO) database (<http://www.ncbi.nlm.nih.gov/geo/>). Dataset GDS1062 was performed on the Affymetrix Human Genome U133A Array (Affymetrix, Santa Clara, CA, USA). Then 18 HNSCC tissues from GDS1062 dataset were divided into two groups (high vs. low) according to the expression level of LDLR and expression value was used as the cut-off point. In order to explore the potential relationship between LDLR and metastasis-associated signatures, “CROMER\_METASTASIS\_UP” and “RICKMAN\_METASTASIS\_UP”. GSEA (<http://software.broadinstitute.org/gsea/index.jsp>) was performed between the two groups.

### **Synthesis**

The Ce6-conjugated NH<sub>2</sub>-mPEG-NH<sub>2</sub> (Ce6-PEG) was prepared by conjugating the amine-functionalized NH<sub>2</sub>-mPEG-NH<sub>2</sub> with activated Ce6. Briefly, 17 mg of Ce6 was mixed with 15 mg of EDC and 15 mg of sulfo-NHS in 4 mL of anhydrous DMSO for 1 hour at room temperature. Then 120 mg of NH<sub>2</sub>-mPEG-NH<sub>2</sub> in 4 mL of DMSO was added (molar ratio of NH<sub>2</sub>-mPEG-NH<sub>2</sub>: Ce6: EDC: NHS = 4:2:5:5). After reacting for 24 hours at room

temperature, the above solution was dialyzed against water by a 1kDa cut off membrane and then lyophilized to obtain Ce6-PEG nanomicelles.

The Ce6-PEG coated tirapazamine (TPZ) was self-assembled. Briefly, The Ce6-PEG was redispersed into methanol and the TPZ was dissolved into chloroform, ultrasound to clear. And mixed to vacuum rotary steam to dry out to obtain the final production Ce6-PEG-TPZ (CPT). Then redispersed for conjugation with anti-LDLR antibody using EDC·HCl as the cross-linker. The Ce-6-PEG was reacted with nanoparticles: anti-LDLR antibody: EDC·HCl in the molar ratio of 1:10:4,000 in a borate saline buffer (50 mM, pH 8.0) under continuous stirring for 2 hours at room temperature. The final production Ce6-PEG-TPZ-Anti-LDLR (CPTA) were dispersed in PBS (0.01 M, pH 7.4) after centrifugation and washed with 0.01 M PBS (pH 7.4) twice.

### **Characterization**

TEM images of the nanomicelles were obtained using a JEM-200CX transmission electron microscope at an acceleration voltage of 300 kV. UV-vis-NIR spectra were obtained with a PerkinElmer Lambda 750 UV-vis-NIR spectrophotometer. Fluorescence spectra of different samples were obtained on a FluoroMax 4 luminescence spectrometer (HORIBA Jobin Yvon). The photothermal conversion efficiency ( $\eta$ ) was calculated using the following equation. ( $c$ : specific heat capacity of CPT solution,  $4.2 \times 10^3 \text{ J}/(\text{kg K})$ ;  $m$ : mass of CPTA solution,  $2.5 \times 10^{-3} \text{ kg}$ ;  $\Delta t$ : temperature increase of CPT solution;  $w$ : laser power,  $1 \text{ W}/\text{cm}^2$ ;  $t$ : laser irradiation time, 600 s)

$$\eta(\%) = \frac{cm\Delta t}{wt} \times 100\% = \frac{4.2 \times 10^3 \times 2.5 \times 10^{-3} \Delta t}{1 \times 600} \times 100\%$$

### **Stability study**

The colloid stability of CPT/CPTA was further evaluated after being dispersed in water, phosphate buffered saline (PBS), Dulbecco's modified Eagle's medium (DMEM), and fetal bovine serum (FBS, BI) for 2 weeks of incubation at room temperature. To test the stability of CPTA after treatment with laser or X-ray irradiation (660nm, 1W/cm<sup>2</sup>, 30min), CPTA solutions were irradiated by laser and X-ray (2Gy), the UV-vis-NIR profiles and images were obtained.

### **Singlet oxygen detection**

The method for singlet oxygen detection was based on the protocol reported previously. In brief, 100 mg of SOSG (Molecular Probes, USA) was dissolved in 330 mL of methanol to

obtain the stock solution of SOSG (0.5 mM). Then, 10 $\mu$ L of SOSG was added to 2 mL of CPT or CPTA solution containing 500 $\mu$ g/mL Ce6. Next, the sample was irradiated by a 660 nm laser at a power density of 1 W/cm<sup>2</sup>. The fluorescence intensity of SOSG was measured with an excitation wavelength of 525nm every 3 minutes.

#### **Cell culture experiment**

Human head and neck squamous cells, HSC3, CAL27, JHU011 and SCC9 were purchased from the Type Culture Collection of the Chinese Academy of Sciences (Shanghai, P. R. China). HSC3, CAL27, JHU011 cells were cultured and maintained in DMEM supplemented with 10% fetal bovine serum (FBS, Biological Industries), 80 $\mu$ g/mL streptomycin, and 80 U/mL penicillin, NaHCO<sub>3</sub>, 4.5 mg/mL glucose, and 0.584g/L L-Glutamine. SCC9 cells were cultured and maintained in RMPI-1640 supplemented with 10% fetal bovine serum (FBS, Biological Industries), 80 $\mu$ g/mL streptomycin, and 80 U/mL penicillin, NaHCO<sub>3</sub>, 4.5 mg/mL glucose, and 0.584g/L L-Glutamine. To assess the viability of HSC3 cells treated with CPT/CPTA at different pO<sub>2</sub> S (21%, and 1%), 2  $\times$  10<sup>3</sup> cells/well were seeded into 96-well plates cultured for 24 h; the cells were then transferred to the indicated oxygen conditions for an additional 24 h. Various concentrations of CPT/CPTA (0, 1.25, 2.5, 5, 10, and 20 $\mu$ g/ml, TPZ) were then added to each well, followed by incubation for an additional 24 h. Cell viability was evaluated with the CCK-8 assay. To determine the LDLR antibody conjugation, the incubation was performed at 4 °C in which only specific binding could occur.

To examine the cellular uptake of CPT/CPTA, HSC3 cells were plated in 6-well plates at 1  $\times$  10<sup>4</sup> cells per well. After adhesion, CPT/CPTA was added into the wells at a concentration of 5 $\mu$ g/mL (TPZ) and cultured for different time periods (2, 4, 8, 12 and 24 hours). After washing three times with PBS (pH = 7.4), cells were fixed by 75% ethanol and labeled with Hoechst 33342 before imaging with a Nikon Digital Eclipse A1 Plus microscope.

To assess the viability of HSC3 cells treated with CPT/CPTA under the laser or not, 2 $\times$ 10<sup>3</sup> cells/well were seeded into 96-well plates cultured for 24 hours. Various concentrations of CPT or CPTA (0, 1.25, 2.5, 5  $\mu$ g/mL, TPZ) were then added to each well, they were irradiated by a 660 nm laser at a power density of 1 W/cm<sup>2</sup> after 4 hours for 5 minutes, followed by incubation for an additional 4 hours, cell viability was evaluated with the CCK-8 assay.

To assess the apoptosis of HSC3 cells treated with CPT/CPTA under the laser or not,  $1 \times 10^4$  cells/well were seeded into 6-well plates. After adhesion, CPT/CPTA were added into the wells at a concentration of  $5 \mu\text{g/mL}$  (TPZ) and cultured for 4 hours. Then the 660 nm laser irradiated at a power density of  $1 \text{ W/cm}^2$  after 4 hours for 5 minutes, followed by incubation for an additional 4 hours. Apoptotic cells were quantified by dual staining with Annexin V and PI. After washing with PBS, the cells were suspended in cold binding buffer. Annexin V ( $5 \mu\text{L}$ ) and  $100 \mu\text{L}$  PBS were added into each well for 10 minutes at  $4^\circ\text{C}$ . Subsequently,  $200 \mu\text{L}$  binding buffer containing  $5 \mu\text{L}$  PI was added. Finally, the entire mixture was incubated at  $4^\circ\text{C}$  for another 15 minutes. All the incubation was performed in the dark. Samples were detected with a FACS Verse flow cytometer (BD Biosciences) and the data obtained were analyzed by FlowJo.

HSC3 cells were maintained in a 35 mm confocal dish at a density of  $2 \times 10^4$  per well for 24 hours. When HSC3 cells had grown to 30% in plates, 2 mL of CPT/CPTA ( $5 \mu\text{g/mL}$ ) was added and further cultured for 4 hours. After 4 hours incubation, cells were irradiated with or without a 660 nm laser ( $1 \text{ W/cm}^2$ , 5 minutes). The synergistic treatment group was irradiated with X-rays immediately after irradiation with a 660 nm laser. After 4h, the cells were fixed with 4% paraformaldehyde for 10 minutes.

The Calcein-AM/PI staining was used for direct observation of living/dead cells. The cells were incubated with Calcein-AM/PI solution ( $4 \mu\text{M}$  for each fluorescent probe in PBS) for 1 h, and then washed for 3 times in PBS before imaged under Nikon Digital Eclipse A1 Plus microscope with green/red fluorescent excitors.

#### ***In vitro* photodynamic therapy**

The Reactive Oxygen Species Assay Kit (Beyotime) was utilized to examine the cellular production of  $^1\text{O}_2$ . The operation according to the instructions. HSC3 cells were plated in six-well plates at  $1 \times 10^4$  cells per well. After adhesion, CPT / CPTA were added into the wells at a concentration of  $5 \mu\text{g/ml}$  (TPZ) and cultured for 4 hours. Then the DCFH-DA add to wells, then the sample was irradiated by a 660 nm laser at a power density of  $1 \text{ W/cm}^2$  after 30 minutes. After washing three times with PBS ( $\text{pH} = 7.4$ ), cells were fixed by 75% ethanol and labeled with Hoechst 33342 before imaging with a Nikon Digital Eclipse A1 Plus microscope.

#### ***In vitro* clonogenic assays of radiotherapy**

Cells were treated with CPT or CPTA for 24 hours, followed by irradiation with 2 Gy using a <sup>137</sup>Cs source. Following irradiation, cells were seeded by limiting dilution at 500 cells per well into 6-well culture plates. After 14 days of culture, cell medium was removed, and cells were rinsed with PBS twice and then fixed with 2 mL of a mixture of 6.0% glutaraldehyde and 0.5% crystal violet added to each well at room temperature for 30 minutes. The glutaraldehyde crystal violet mixture was carefully immersed in tap water until all excess dye was removed, and plates were air-dried at room temperature. The resulting stained cell colonies were counted using a stereomicroscope.

### **DNA double-strand breaks of radiotherapy**

HSC3 cells were maintained in a 35 mm confocal dish at a density of  $2 \times 10^4$  per well for 24 hours and divided into 12 groups: (a) PBS only; (b) Laser only; (c) RT only; (d) CPT only; (e) CPTA only; (f) CPT & Laser; (g) CPTA & Laser; (h) CPT & RT; (i) CPTA & RT; (j) CPT & Laser+ RT; (k) CPT & Laser+ RT. When HSC3 cells had grown to 30% in plates, 2 mL of CPT/CPTA (5 µg/mL) was added and further cultured for 24 hours. The well without any treatments was regarded as the negative control group. After 24 hours incubation, cells were irradiated with or without a 660 nm laser (1 W/cm<sup>2</sup>, 10 minutes) and X-ray (2 Gy). The synergistic treatment group was irradiated with X-rays immediately after irradiation with a 660 nm laser. After 24 hours, the cells were fixed with 4% paraformaldehyde for 10 minutes and Triton X-100 was used to permeate the cells. Next, the cells were further incubated in 0.5% bovine serum albumin for another 1 hours to prevent nonspecific protein interactions. Next, the cells were then treated with  $\gamma$ -H2A.X antibody (1:100, Abcam) overnight at 4°C. The Dylight 594-goat anti-rabbit IgG (dilution 1:100, Earthox) was added for 1 h. Hoechst 33342 was used to stain the cell nuclei.

### **Animal models**

All animal procedures were performed in accordance with the Guidelines for Care and Use of Laboratory Animals of the Medical School of Nanjing University and Experiments were approved by the Animal Ethics Committee of Nanjing Stomatological Hospital. To set up the tumor xenograft model, Balb/c male nude mice (6 weeks old, average body weight: 22 g; Nanjing Biomedical Research Institute of Nanjing University, Nanjing, China) were subcutaneously injected in the bottom back with  $5 \times 10^6$  HSC3 cells/mouse. After approximately 2 weeks post injection, the tumor nodules reached a volume of 100 mm<sup>3</sup>. The



tumor size was monitored by a Vernier caliper, and the tumor volume (V) was calculated as  $V = L \times W^2/2$ , where L and W are the length and width of the tumor, respectively.

#### **Hemolysis test**

Hemolysis assay was carried out by using mice RBCs as model cells. RBCs were isolated and washed with PBS five times. Then different concentrations of CTP & CPTA were added into the cell suspensions of the obtained RBCs for 3 hours. The released hemoglobin in the supernatant was determined by measuring its absorbance at 540 nm. The extent of hemolysis was calculated relative to 100% hemolysis treated with ultrapure water.

#### **Biodistribution**

When the tumor volume reached around 100 mm<sup>3</sup>, mice were injected CPT/CPTA (TPZ, 60nmol/kg). Then the fluorescence spectra of different mice were obtained on a FluoroMax 4 luminescence spectrometer (HORIBA Jobin Yvon). At 4 hours, the mice were euthanized, and the tumor and major organs were collected to test the fluorescence spectra. The mouse with an injection of PBS was used as a blank control.

#### ***In vivo* antitumor evaluation**

The tumor-bearing mice were weighed and randomly divided into different groups when the tumor volume reached around 100mm<sup>3</sup>. The mice were then divided into 12 groups to receive different disposes: (a) PBS (phosphate buffered saline) only; (b) Laser only; (c)RT only; (d)CPT only; (e) CPTA only; (f) CPT & Laser; (g) CPTA & Laser; (h) CPT & RT; (i) CPTA & RT; (j) CPT & Laser+ RT; (k) CPT & Laser+ RT. Each group included four mice. From day 0, the corresponding mice were intravenously injected CPT/CPTA (TPZ, 60nmol/kg). After 4 hours, the corresponding mice received was irradiated by a 660 nm laser at a power density of 1 W/cm<sup>2</sup> for 10 minutes. After 4 hours, the mice received the 2 Gy of X-ray radiation according to group requirements on a Siemens Primus clinical linear accelerator (6 MeV) using a 1cm × 1cm radiation field to cover the entire tumor without the need of critical anatomies at a source-to-skin distance of 100 cm. All treatments were given only once. During the next 15 days, the tumor volume and the whole body weight of each mouse were measured with a vernier caliper every other day.

#### **Histology analysis**

At day 15, the mice were euthanized, and the tumor and major organs were collected, and fixed in the 10% neutral-buffered formalin and embedded in paraffin. For the hematoxylin

and eosin staining, the formalin-fixed tumors were embedded in paraffin blocks and visualized by an optical microscope (DM5500B, Leica). And the terminal deoxynucleotidyl transferase dUTP nick end labeling (TUNEL) staining was constructed following the protocol and visualized by Nikon Digital Eclipse A1 Plus microscope.

### **Statistical analysis**

The correlations of LDLR expression and lymph node metastasis were evaluated with Fisher's exact test. The Kaplan-Meier survival curve was generated based on LDLR expression and statistical significance was determined by log-rank tests. All other statistical analyzes were performed using Statistical Product and Service Solutions software. A p-value of  $< 0.05$  was considered statistically significant. GraphPad Prism 5.0 software was used to create the figures.

## Supporting Information

Table S1. Names of HIF-1 signaling pathway genes and their corresponding primer ID.

| Gene_symbol | Primer_id | Gene_symbol | Primer_id |
|-------------|-----------|-------------|-----------|
| ADORA2B     | 9000000   | KCTD11      | 31454     |
| LDLR        | 9000031   | LRP2BP      | 96905     |
| MIF         | 9000040   | MRPL14      | 100063    |
| NME1        | 9000044   | PPM1J       | 109404    |
| ANKRD9      | 9000092   | TMEM30B     | 49172     |
| TMEM189     | 9000095   | TRMT5       | 49057     |
| BNIP3       | 6247505   | B4GALT2     | 6032754   |
| SLIRP       | 9000087   | MNAT1       | 6002838   |
| HILPDA      | 9000084   | PGK1        | 6020364   |
| PGAM1       | 9000049   | PTGFRN      | 6045092   |
| TUBB2A      | 9000069   | PVR         | 6009940   |
| VAPB        | 9000079   | GEMIN2      | 6016229   |
| CXCL8       | 52117     | TEAD4       | 6098208   |
| NDRG1       | 6212020   | TFAP2C      | 6014618   |
| PGF         | 6219000   | TPD52L2     | 6019209   |
| PAWR        | 6247898   | ANGPTL4     | 6078448   |
| PYGL        | 6210024   | ANLN        | 6002193   |
| SLC2A1      | 6218206   | CNIH4       | 6055569   |
| TNS4        | 6223823   | HAUS2       | 6049632   |

|         |         |         |         |
|---------|---------|---------|---------|
| VEGFA   | 6028587 | NUDT15  | 6047688 |
| BCAR1   | 6202814 | PLEKHG3 | 6039185 |
| ALDOA   | 64498   | RUVBL2  | 6089738 |
| CA9     | 40382   | SLCO1B3 | 6027400 |
| KRT17   | 86118   | SNX24   | 6007243 |
| LDHA    | 46794   | TANC2   | 6081550 |
| MTX1    | 124792  | TIMM23  | 9000256 |
| AK3     | 19178   | VEZT    | 6003341 |
| DPM2    | 98160   | CA12    | 6205575 |
| MRPS17  | 55695   | COL4A5  | 6094310 |
| PDZD11  | 65415   | GMFB    | 6253804 |
| PLAU    | 76834   | GSS     | 6210287 |
| PPARD   | 87674   | P4HA1   | 6220253 |
| PSMA7   | 85282   | PFKFB4  | 6216348 |
| PSMD2   | 117520  | PSMB7   | 6226907 |
| RAN     | 119328  | HOMER1  | 6234660 |
| RNPS1   | 27759   | PPP4R1  | 6235890 |
| S100A10 | 121228  | IGF2BP2 | 6205459 |
| S100A3  | 122110  | RNF24   | 22932   |
| SLC16A1 | 109499  | CORO1C  | 6214786 |
| SLC6A8  | 104090  | GPN3    | 6214910 |

|        |         |       |         |
|--------|---------|-------|---------|
| SPTB   | 52955   | XPO5  | 6221036 |
| TPBG   | 114093  | RPL27 | 91408   |
| TPI1   | 21102   | HPRT1 | 96179   |
| MRGBP  | 87188   | ACTB  | 19435   |
| CDCA4  | 85137   | OAZ1  | 21566   |
| EIF2S1 | 6044854 | B2M   | 34448   |
| HES2   | 8687    | GAPDH | 17872   |

---

Table S2. Differentially expressed genes in HNSCC patients with lymph node metastasis compared to those without metastasis.

---

| Dysregulated  | Gene    |
|---------------|---------|
| Upregulated   | PSMA7   |
|               | RNPS1   |
|               | SLC6A8  |
|               | TIMM23  |
|               | TMEM189 |
|               | TRMT5   |
|               | LDLR    |
|               | NME1    |
| Downregulated | ANGPTL4 |
|               | PFKFB4  |

---

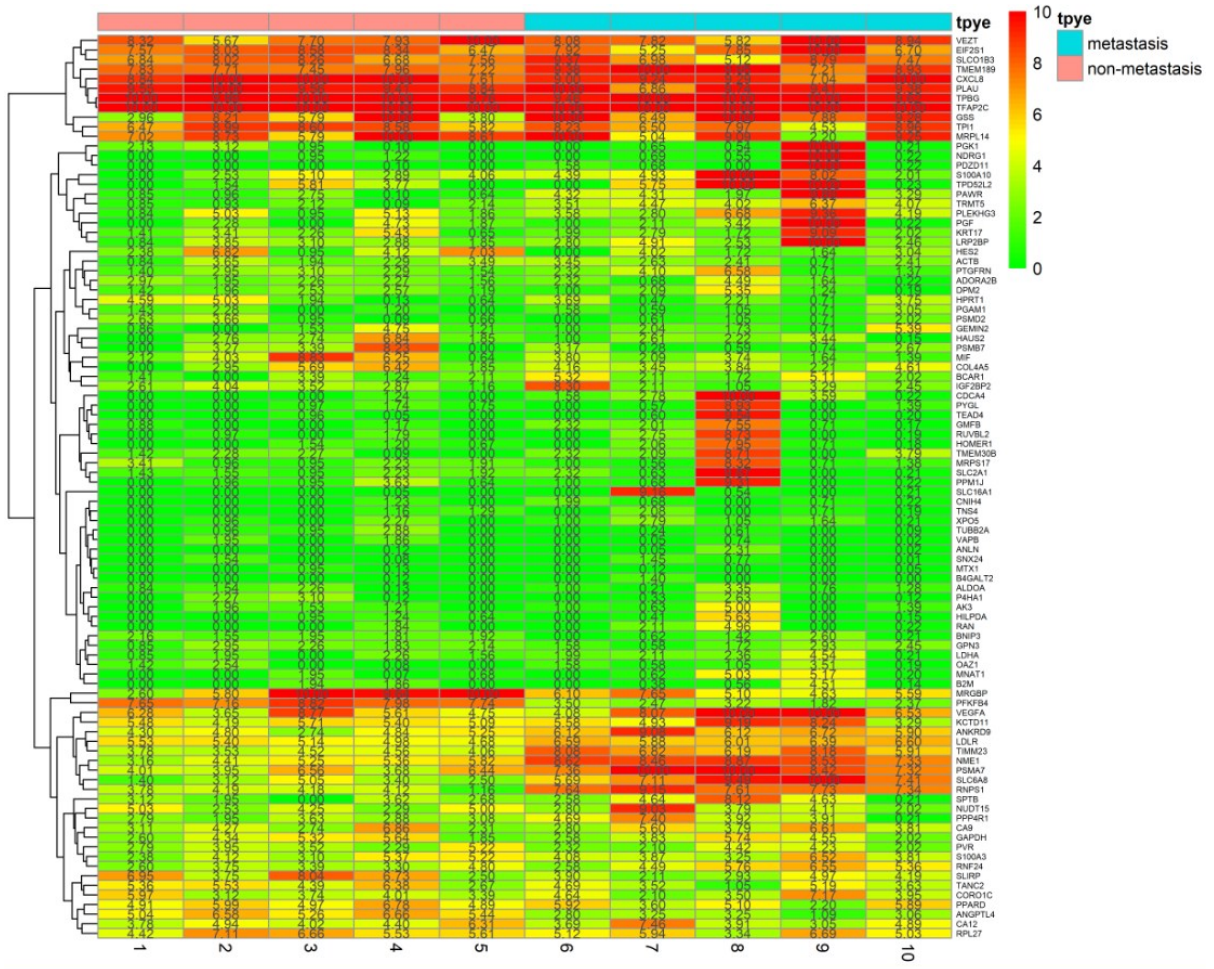

Figure S1. Original picture of Figure 1A.

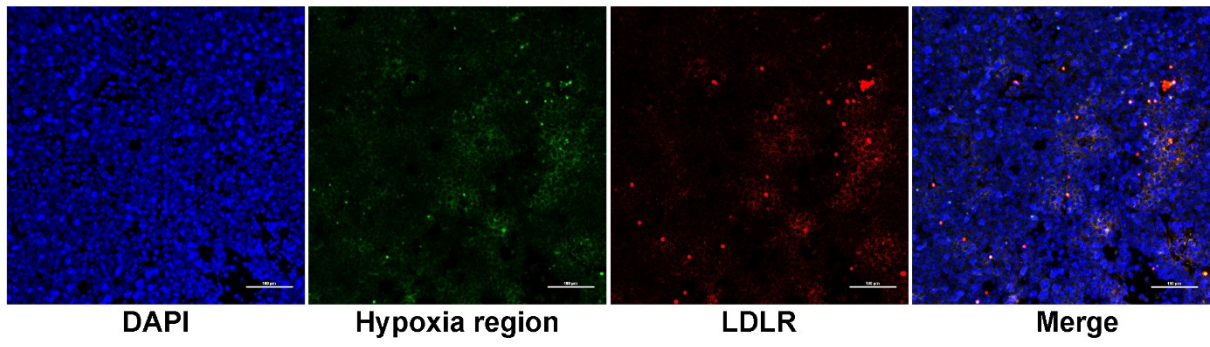

Figure S2. The immunofluorescence images of xenograft tumor. Scale bar: 100 μm.



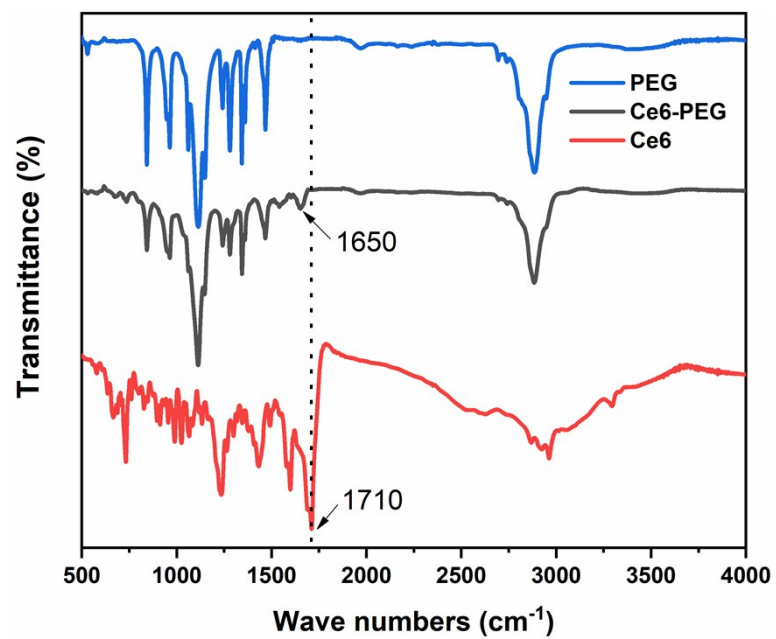

Figure S3. The fourier transform infrared (FTIR) image of PEG, Ce6, and CE6-PEG.

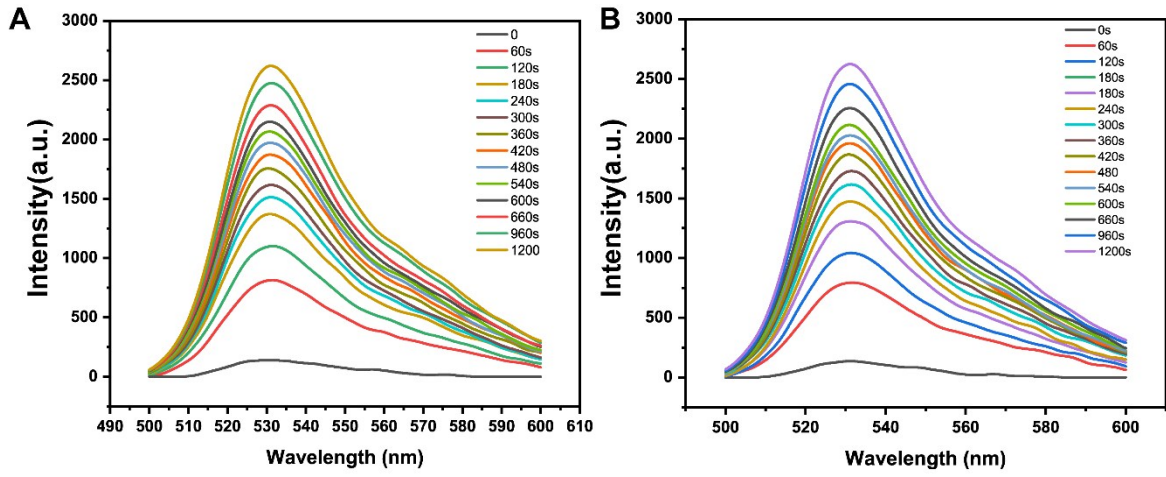

Figure S4. The photodynamic profiles of (A) CPT and (B) CPTA in PBS (500 µg/mL). The intensity of SOSG after received different laser irradiation (1 W/cm<sup>2</sup>) time.

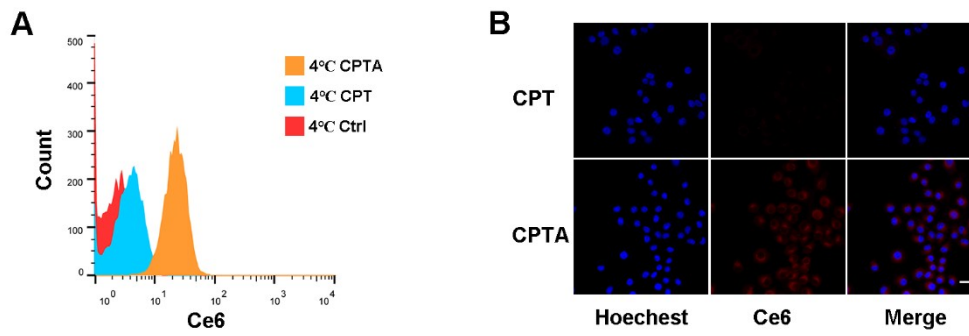

Figure S5. The binding tests of CPT and Anti-LDLR. (A) CLSM images of HSC3 cells treated with CPT & CPTA after 1 hour in 4°C. Scale bar: 50μm. (B) Flow cytometry showing the uptake of CPT & CPTA in HSC3 cells after 1 hour in 4°C. Scale bar: 50 μm.

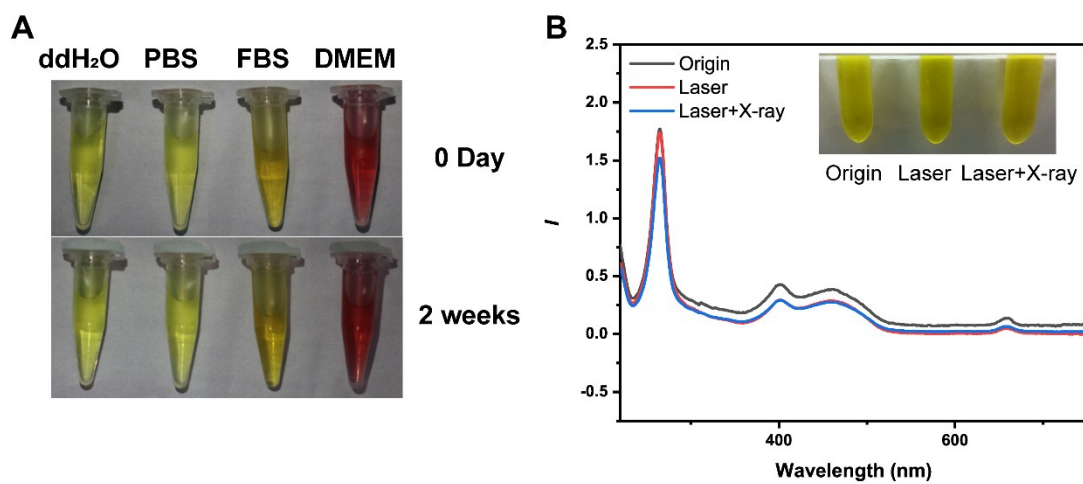

Figure S6. (A) The appearance of CPTA in different media at room temperature after two weeks. (B) The appearance and UV-vis-NIR profiles of CPTA solutions after laser and X-ray irradiation.

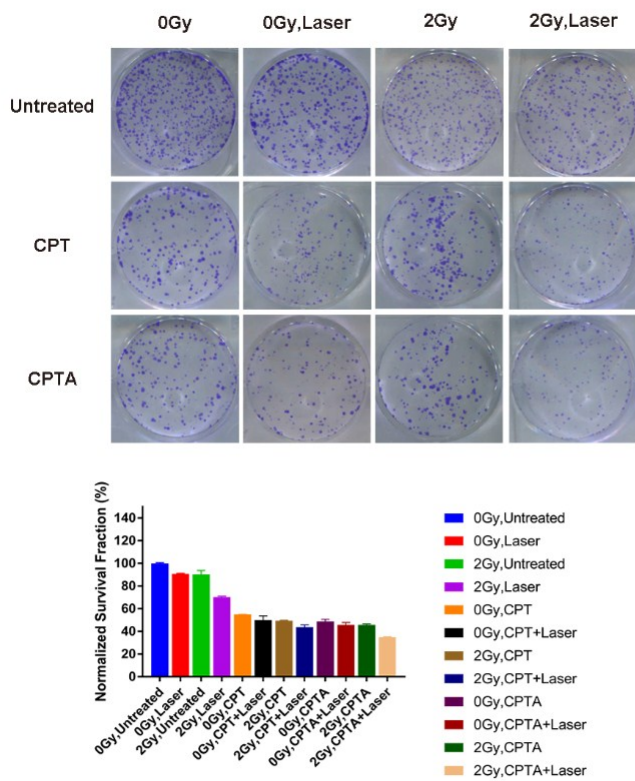

Figure S7. The colony formation assays of HSC3 cells after different treatment.

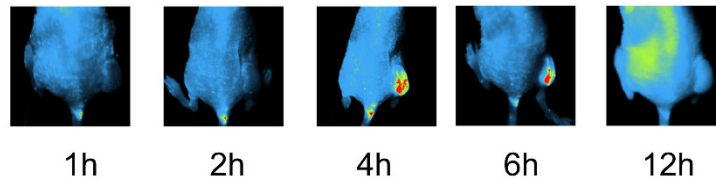

Figure S8. The in vivo fluorescence imaging at different time points.

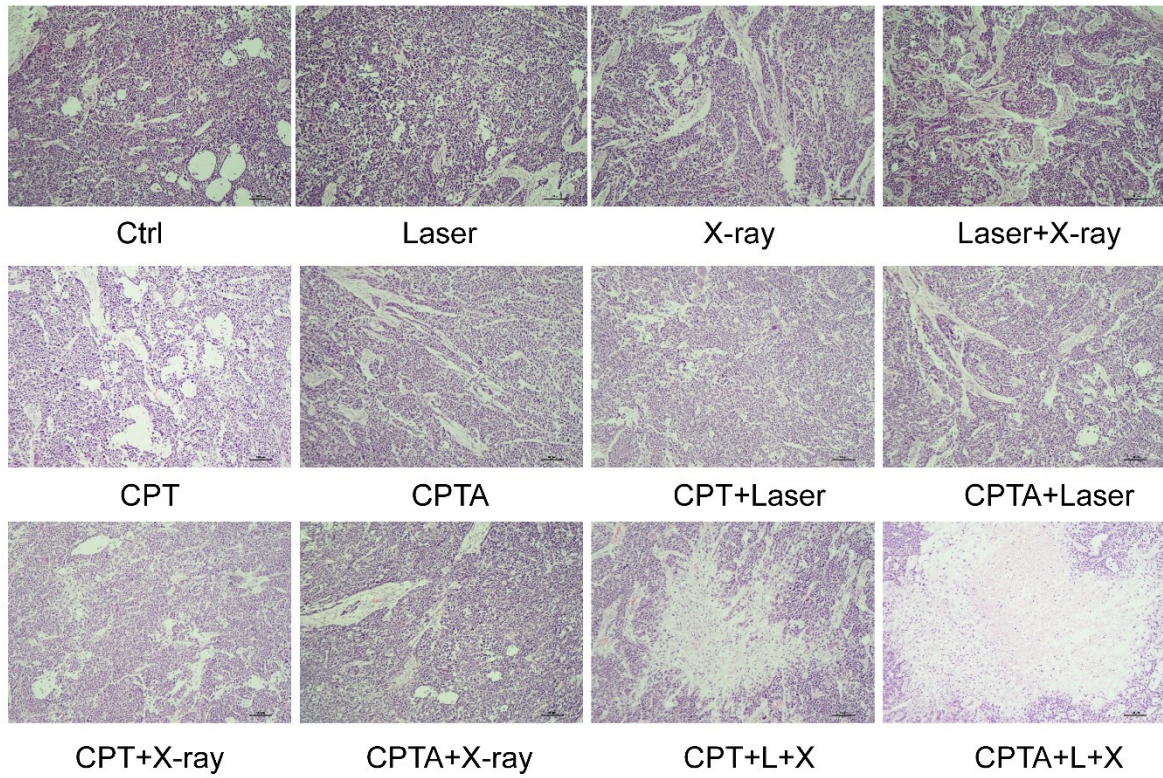

Figure S9. The H&E staining histological images of tumor after different treatment. Scale bar: 100 $\mu$ m

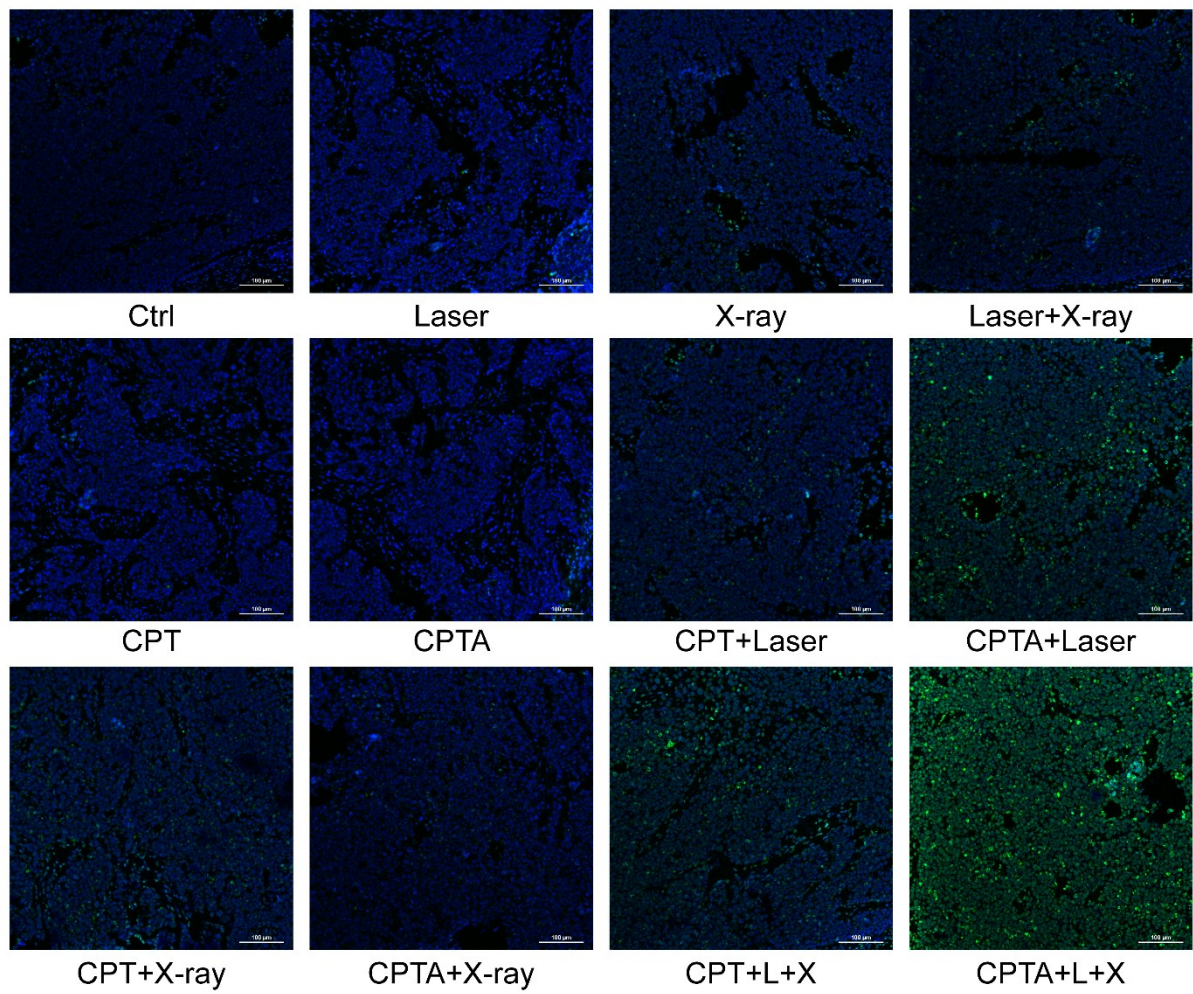

Figure S10. TUNEL staining of tumor after different treatment. Scale bar: 100μm.



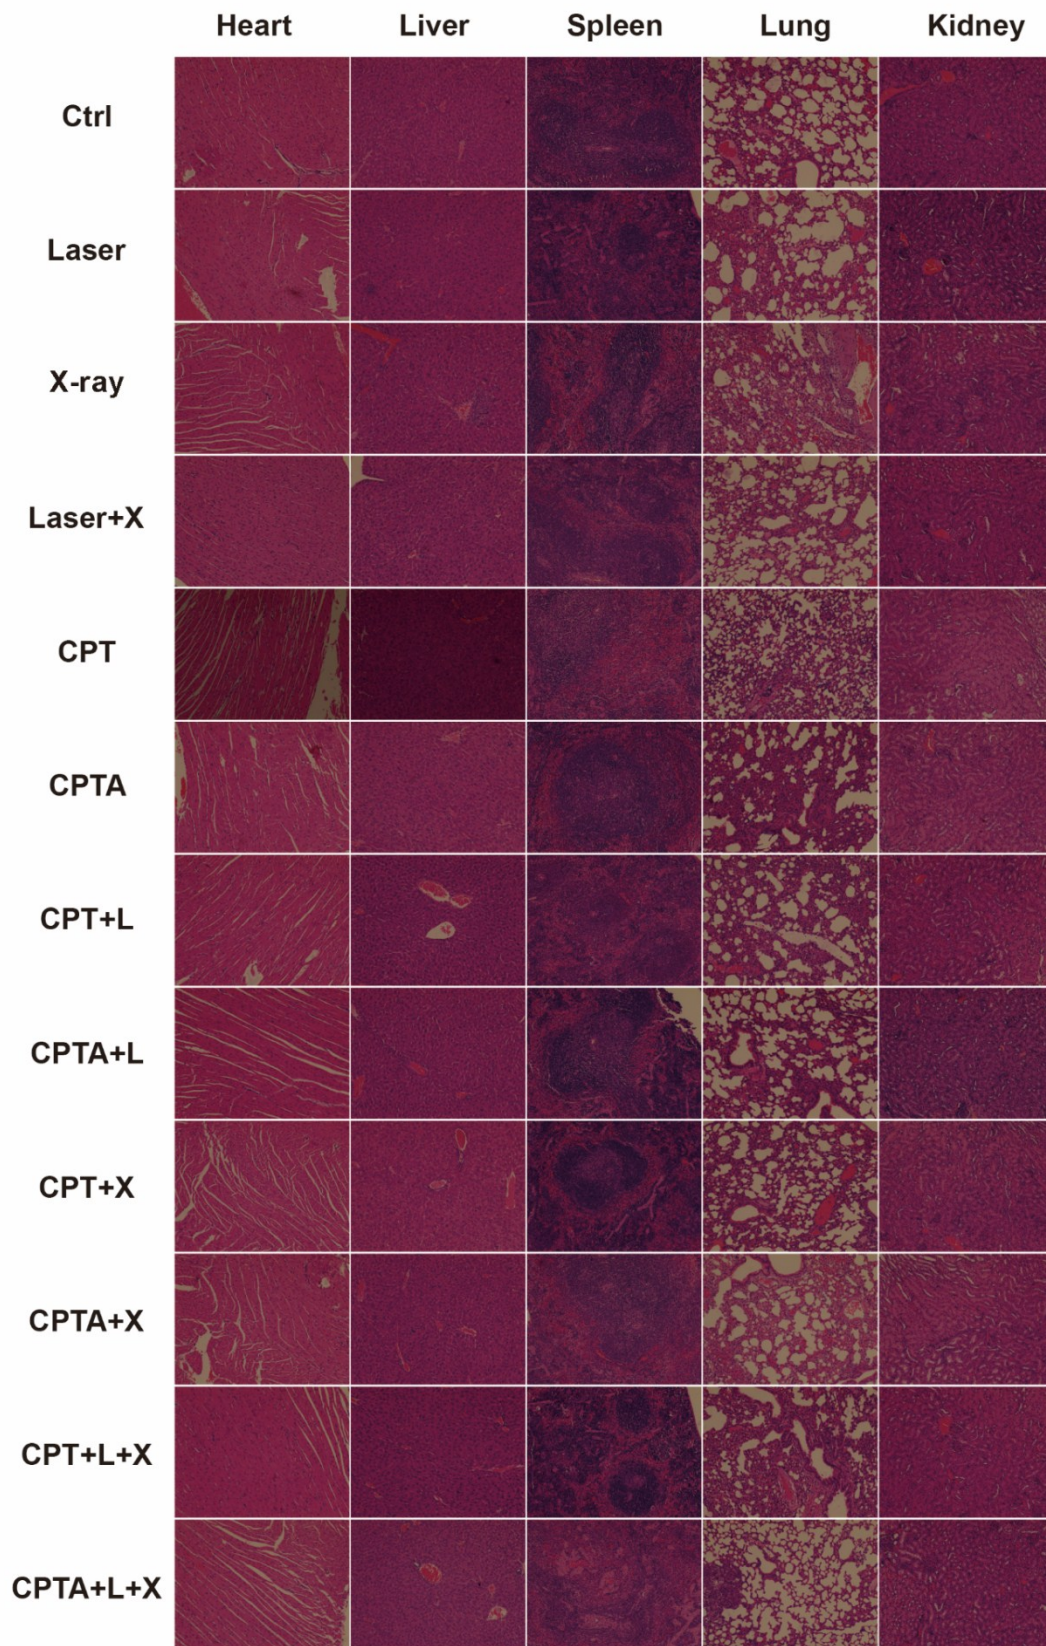

Figure S11. H&E stained histological images of major organs collected after 15 days in mice of different groups.
